# Supplementary material for: Conserved MicroRNA Act Boldly During Sprout Development and Quality Formation in Pingyang Tezaocha (Camellia sinensis)
Source: Front Genet. 2019 Mar 28;10:237. doi: 10.3389/fgene.2019.00237 (PMC6455055; doi:10.3389/fgene.2019.00237)
Supplement: Supplementary Table 8 — The complete list of target genes of all miRNA. [file Table_8.XLSX]

## Sheet: Supplementary Table 8
Supplementary Table 8 The complete list of target genes of all miRNA.
mirna	target
miR1042-x	CSA005387.1
miR1042-x	CSA006687.1
miR1042-x	CSA011851.1
miR1042-x	CSA012391.1
miR1042-x	CSA012779.1
miR1042-x	CSA013057.1
miR1042-x	CSA014613.1
miR1042-x	CSA018787.1
miR1042-x	CSA020793.1
miR1042-x	CSA022292.1
miR1042-x	CSA027812.1
miR1042-x	CSA029566.1
miR1042-x	CSA030679.1
miR1042-x	CSA033323.1
miR1042-x	CSA033469.1
miR1042-x	CSA035397.1
miR1042-x	CSA036728.1
miR1045-x	CSA000049.1
miR1045-x	CSA000326.1
miR1045-x	CSA000597.1
miR1045-x	CSA001785.1
miR1045-x	CSA001878.1
miR1045-x	CSA002116.1
miR1045-x	CSA002344.1
miR1045-x	CSA002930.1
miR1045-x	CSA002980.1
miR1045-x	CSA003043.1
miR1045-x	CSA003315.1
miR1045-x	CSA003978.1
miR1045-x	CSA004272.1
miR1045-x	CSA004338.1
miR1045-x	CSA004620.1
miR1045-x	CSA005606.1
miR1045-x	CSA005607.1
miR1045-x	CSA006077.1
miR1045-x	CSA006796.1
miR1045-x	CSA006976.1
miR1045-x	CSA007077.1
miR1045-x	CSA007321.1
miR1045-x	CSA007657.1
miR1045-x	CSA007700.1
miR1045-x	CSA007739.1
miR1045-x	CSA007901.1
miR1045-x	CSA008287.1
miR1045-x	CSA008395.1
miR1045-x	CSA008445.1
miR1045-x	CSA008691.1
miR1045-x	CSA009211.1
miR1045-x	CSA009868.1
miR1045-x	CSA009873.1
miR1045-x	CSA009939.1
miR1045-x	CSA010310.1
miR1045-x	CSA010410.1
miR1045-x	CSA010796.1
miR1045-x	CSA010829.1
miR1045-x	CSA011184.1
miR1045-x	CSA011372.1
miR1045-x	CSA011541.1
miR1045-x	CSA011751.1
miR1045-x	CSA012787.1
miR1045-x	CSA012955.1
miR1045-x	CSA013126.1
miR1045-x	CSA013261.1
miR1045-x	CSA013396.1
miR1045-x	CSA013422.1
miR1045-x	CSA013923.1
miR1045-x	CSA014798.1
miR1045-x	CSA015362.1
miR1045-x	CSA016021.1
miR1045-x	CSA016054.1
miR1045-x	CSA016179.1
miR1045-x	CSA016206.1
miR1045-x	CSA016325.1
miR1045-x	CSA017029.1
miR1045-x	CSA017430.1
miR1045-x	CSA017945.1
miR1045-x	CSA018956.1
miR1045-x	CSA019010.1
miR1045-x	CSA019450.1
miR1045-x	CSA019569.1
miR1045-x	CSA019575.1
miR1045-x	CSA019625.1
miR1045-x	CSA020077.1
miR1045-x	CSA020454.1
miR1045-x	CSA020711.1
miR1045-x	CSA020851.1
miR1045-x	CSA021174.1
miR1045-x	CSA022140.1
miR1045-x	CSA022554.1
miR1045-x	CSA023061.1
miR1045-x	CSA023166.1
miR1045-x	CSA023200.1
miR1045-x	CSA023308.1
miR1045-x	CSA023429.1
miR1045-x	CSA023608.1
miR1045-x	CSA024474.1
miR1045-x	CSA024628.1
miR1045-x	CSA024744.1
miR1045-x	CSA025258.1
miR1045-x	CSA025262.1
miR1045-x	CSA025287.1
miR1045-x	CSA025936.1
miR1045-x	CSA025937.1
miR1045-x	CSA026263.1
miR1045-x	CSA026639.1
miR1045-x	CSA026948.1
miR1045-x	CSA027292.1
miR1045-x	CSA027335.1
miR1045-x	CSA027413.1
miR1045-x	CSA027550.1
miR1045-x	CSA027561.1
miR1045-x	CSA028450.1
miR1045-x	CSA029413.1
miR1045-x	CSA029786.1
miR1045-x	CSA029901.1
miR1045-x	CSA030332.1
miR1045-x	CSA030363.1
miR1045-x	CSA030997.1
miR1045-x	CSA032658.1
miR1045-x	CSA032937.1
miR1045-x	CSA033045.1
miR1045-x	CSA034057.1
miR1045-x	CSA036016.1
miR1045-x	CSA036548.1
miR1045-x	CSA036749.1
miR1045-x	CSA036825.1
miR1057-y	CSA000478.1
miR1057-y	CSA002133.1
miR1057-y	CSA002968.1
miR1057-y	CSA009221.1
miR1057-y	CSA010503.1
miR1057-y	CSA011707.1
miR1057-y	CSA016096.1
miR1057-y	CSA017795.1
miR1057-y	CSA019028.1
miR1057-y	CSA020074.1
miR1057-y	CSA024510.1
miR1057-y	CSA025613.1
miR1057-y	CSA026298.1
miR1057-y	CSA027140.1
miR1057-y	CSA032417.1
miR1057-y	CSA032626.1
miR1057-y	CSA033517.1
miR1057-y	CSA034251.1
miR1057-y	CSA035705.1
miR1057-y	CSA036103.1
miR1063-x	CSA006251.1
miR1063-x	CSA019183.1
miR1127-x	CSA001168.1
miR1127-x	CSA001730.1
miR1127-x	CSA002246.1
miR1127-x	CSA003427.1
miR1127-x	CSA003737.1
miR1127-x	CSA005689.1
miR1127-x	CSA005741.1
miR1127-x	CSA005805.1
miR1127-x	CSA005835.1
miR1127-x	CSA005838.1
miR1127-x	CSA006552.1
miR1127-x	CSA006848.1
miR1127-x	CSA010179.1
miR1127-x	CSA011823.1
miR1127-x	CSA014073.1
miR1127-x	CSA014074.1
miR1127-x	CSA014102.1
miR1127-x	CSA017686.1
miR1127-x	CSA017765.1
miR1127-x	CSA017933.1
miR1127-x	CSA018498.1
miR1127-x	CSA019881.1
miR1127-x	CSA020144.1
miR1127-x	CSA023929.1
miR1127-x	CSA025131.1
miR1127-x	CSA027021.1
miR1127-x	CSA027642.1
miR1127-x	CSA027916.1
miR1127-x	CSA027917.1
miR1127-x	CSA028376.1
miR1127-x	CSA028630.1
miR1127-x	CSA031538.1
miR1127-x	CSA031539.1
miR1127-x	CSA031791.1
miR1127-x	CSA032226.1
miR1127-x	CSA034591.1
miR1127-x	CSA035699.1
miR1127-x	CSA035900.1
miR1127-x	CSA036469.1
miR1133-x	CSA005805.1
miR1511-y	CSA000605.1
miR1511-y	CSA000972.1
miR1511-y	CSA001314.1
miR1511-y	CSA001490.1
miR1511-y	CSA002134.1
miR1511-y	CSA002585.1
miR1511-y	CSA005610.1
miR1511-y	CSA006167.1
miR1511-y	CSA006279.1
miR1511-y	CSA006547.1
miR1511-y	CSA006567.1
miR1511-y	CSA006640.1
miR1511-y	CSA007125.1
miR1511-y	CSA007849.1
miR1511-y	CSA009180.1
miR1511-y	CSA010466.1
miR1511-y	CSA010632.1
miR1511-y	CSA011649.1
miR1511-y	CSA011650.1
miR1511-y	CSA012851.1
miR1511-y	CSA013099.1
miR1511-y	CSA013813.1
miR1511-y	CSA013933.1
miR1511-y	CSA014310.1
miR1511-y	CSA014842.1
miR1511-y	CSA015965.1
miR1511-y	CSA016207.1
miR1511-y	CSA017336.1
miR1511-y	CSA017571.1
miR1511-y	CSA019279.1
miR1511-y	CSA024501.1
miR1511-y	CSA026899.1
miR1511-y	CSA027002.1
miR1511-y	CSA028981.1
miR1511-y	CSA030288.1
miR1511-y	CSA030806.1
miR1511-y	CSA032498.1
miR1511-y	CSA033017.1
miR1511-y	CSA033907.1
miR1511-y	CSA035229.1
miR1511-y	CSA035951.1
miR1511-y	CSA036854.1
miR156-x	CSA007311.1
miR156-x	CSA009012.1
miR156-x	CSA011373.1
miR156-x	CSA013149.1
miR156-x	CSA017838.1
miR156-x	CSA019508.1
miR156-x	CSA020439.1
miR156-x	CSA023442.1
miR156-x	CSA031667.1
miR156-y	CSA000836.1
miR156-y	CSA003427.1
miR156-y	CSA009541.1
miR156-y	CSA011422.1
miR156-y	CSA013833.1
miR156-y	CSA016734.1
miR156-y	CSA017661.1
miR156-y	CSA019122.1
miR156-y	CSA021616.1
miR156-y	CSA022390.1
miR156-y	CSA024030.1
miR156-y	CSA027207.1
miR156-y	CSA028772.1
miR156-y	CSA036087.1
miR157-x	CSA004992.1
miR157-x	CSA005105.1
miR157-x	CSA007311.1
miR157-x	CSA008256.1
miR157-x	CSA009012.1
miR157-x	CSA011373.1
miR157-x	CSA013149.1
miR157-x	CSA019508.1
miR157-x	CSA020439.1
miR157-x	CSA023442.1
miR157-x	CSA023939.1
miR157-x	CSA031667.1
miR159-x	CSA000677.1
miR159-x	CSA001326.1
miR159-x	CSA001515.1
miR159-x	CSA001747.1
miR159-x	CSA001849.1
miR159-x	CSA002218.1
miR159-x	CSA002292.1
miR159-x	CSA002589.1
miR159-x	CSA004456.1
miR159-x	CSA004894.1
miR159-x	CSA005593.1
miR159-x	CSA006306.1
miR159-x	CSA006823.1
miR159-x	CSA007104.1
miR159-x	CSA007166.1
miR159-x	CSA007248.1
miR159-x	CSA007290.1
miR159-x	CSA008126.1
miR159-x	CSA008225.1
miR159-x	CSA008291.1
miR159-x	CSA008533.1
miR159-x	CSA008811.1
miR159-x	CSA008972.1
miR159-x	CSA009294.1
miR159-x	CSA009403.1
miR159-x	CSA009429.1
miR159-x	CSA009733.1
miR159-x	CSA010014.1
miR159-x	CSA010486.1
miR159-x	CSA010819.1
miR159-x	CSA011482.1
miR159-x	CSA012607.1
miR159-x	CSA012908.1
miR159-x	CSA013358.1
miR159-x	CSA014205.1
miR159-x	CSA014284.1
miR159-x	CSA014977.1
miR159-x	CSA015610.1
miR159-x	CSA016425.1
miR159-x	CSA016997.1
miR159-x	CSA017012.1
miR159-x	CSA017564.1
miR159-x	CSA017583.1
miR159-x	CSA017722.1
miR159-x	CSA018191.1
miR159-x	CSA018562.1
miR159-x	CSA018568.1
miR159-x	CSA018844.1
miR159-x	CSA019102.1
miR159-x	CSA019445.1
miR159-x	CSA019535.1
miR159-x	CSA019957.1
miR159-x	CSA020041.1
miR159-x	CSA020295.1
miR159-x	CSA020525.1
miR159-x	CSA021181.1
miR159-x	CSA021548.1
miR159-x	CSA021713.1
miR159-x	CSA021729.1
miR159-x	CSA022188.1
miR159-x	CSA022688.1
miR159-x	CSA022922.1
miR159-x	CSA023099.1
miR159-x	CSA023203.1
miR159-x	CSA023618.1
miR159-x	CSA024692.1
miR159-x	CSA024693.1
miR159-x	CSA025240.1
miR159-x	CSA025888.1
miR159-x	CSA026123.1
miR159-x	CSA026140.1
miR159-x	CSA026298.1
miR159-x	CSA026507.1
miR159-x	CSA027049.1
miR159-x	CSA027769.1
miR159-x	CSA027773.1
miR159-x	CSA028111.1
miR159-x	CSA028174.1
miR159-x	CSA028336.1
miR159-x	CSA028436.1
miR159-x	CSA028699.1
miR159-x	CSA029078.1
miR159-x	CSA029388.1
miR159-x	CSA029813.1
miR159-x	CSA029875.1
miR159-x	CSA030006.1
miR159-x	CSA030229.1
miR159-x	CSA030640.1
miR159-x	CSA030662.1
miR159-x	CSA031725.1
miR159-x	CSA031926.1
miR159-x	CSA032502.1
miR159-x	CSA033048.1
miR159-x	CSA033434.1
miR159-x	CSA033453.1
miR159-x	CSA033616.1
miR159-x	CSA033773.1
miR159-x	CSA033778.1
miR159-x	CSA033822.1
miR159-x	CSA034355.1
miR159-x	CSA034886.1
miR159-x	CSA034987.1
miR159-x	CSA035326.1
miR159-x	CSA035579.1
miR159-x	CSA035674.1
miR159-x	CSA036681.1
miR159-y	CSA005108.1
miR159-y	CSA007341.1
miR159-y	CSA013833.1
miR159-y	CSA014562.1
miR159-y	CSA030704.1
miR159-y	CSA036087.1
miR160-x	CSA005884.1
miR160-x	CSA010141.1
miR160-x	CSA012245.1
miR160-x	CSA021765.1
miR160-x	CSA026035.1
miR160-x	CSA026847.1
miR160-x	CSA029222.1
miR160-x	CSA035909.1
miR160-y	CSA024426.1
miR162-y	CSA008229.1
miR162-y	CSA018256.1
miR162-y	CSA018257.1
miR162-y	CSA024944.1
miR164-x	CSA013362.1
miR164-x	CSA027185.1
miR164-x	CSA033493.1
miR164-y	CSA000042.1
miR164-y	CSA000151.1
miR164-y	CSA000817.1
miR164-y	CSA000908.1
miR164-y	CSA001299.1
miR164-y	CSA001321.1
miR164-y	CSA001374.1
miR164-y	CSA001853.1
miR164-y	CSA002016.1
miR164-y	CSA002361.1
miR164-y	CSA002391.1
miR164-y	CSA002438.1
miR164-y	CSA002930.1
miR164-y	CSA003010.1
miR164-y	CSA003462.1
miR164-y	CSA003947.1
miR164-y	CSA004097.1
miR164-y	CSA004941.1
miR164-y	CSA005020.1
miR164-y	CSA005201.1
miR164-y	CSA005535.1
miR164-y	CSA005686.1
miR164-y	CSA006928.1
miR164-y	CSA007352.1
miR164-y	CSA007615.1
miR164-y	CSA008164.1
miR164-y	CSA008571.1
miR164-y	CSA008858.1
miR164-y	CSA009915.1
miR164-y	CSA010310.1
miR164-y	CSA010621.1
miR164-y	CSA010709.1
miR164-y	CSA010909.1
miR164-y	CSA010927.1
miR164-y	CSA010943.1
miR164-y	CSA011267.1
miR164-y	CSA011590.1
miR164-y	CSA011736.1
miR164-y	CSA011836.1
miR164-y	CSA011851.1
miR164-y	CSA011915.1
miR164-y	CSA011950.1
miR164-y	CSA012419.1
miR164-y	CSA012712.1
miR164-y	CSA012881.1
miR164-y	CSA012985.1
miR164-y	CSA013100.1
miR164-y	CSA013128.1
miR164-y	CSA014149.1
miR164-y	CSA014469.1
miR164-y	CSA014640.1
miR164-y	CSA014827.1
miR164-y	CSA014965.1
miR164-y	CSA015083.1
miR164-y	CSA015226.1
miR164-y	CSA015650.1
miR164-y	CSA015755.1
miR164-y	CSA015826.1
miR164-y	CSA016138.1
miR164-y	CSA016482.1
miR164-y	CSA016828.1
miR164-y	CSA016924.1
miR164-y	CSA016958.1
miR164-y	CSA017255.1
miR164-y	CSA017286.1
miR164-y	CSA018172.1
miR164-y	CSA018706.1
miR164-y	CSA019420.1
miR164-y	CSA020424.1
miR164-y	CSA020769.1
miR164-y	CSA022238.1
miR164-y	CSA022569.1
miR164-y	CSA022872.1
miR164-y	CSA022896.1
miR164-y	CSA023909.1
miR164-y	CSA024039.1
miR164-y	CSA024057.1
miR164-y	CSA024981.1
miR164-y	CSA025050.1
miR164-y	CSA025133.1
miR164-y	CSA025208.1
miR164-y	CSA025631.1
miR164-y	CSA025666.1
miR164-y	CSA025746.1
miR164-y	CSA026034.1
miR164-y	CSA026166.1
miR164-y	CSA026211.1
miR164-y	CSA026914.1
miR164-y	CSA027805.1
miR164-y	CSA027985.1
miR164-y	CSA028394.1
miR164-y	CSA028486.1
miR164-y	CSA028953.1
miR164-y	CSA029591.1
miR164-y	CSA030549.1
miR164-y	CSA030761.1
miR164-y	CSA030868.1
miR164-y	CSA030871.1
miR164-y	CSA031479.1
miR164-y	CSA031504.1
miR164-y	CSA031645.1
miR164-y	CSA031852.1
miR164-y	CSA032099.1
miR164-y	CSA032120.1
miR164-y	CSA032378.1
miR164-y	CSA032550.1
miR164-y	CSA032601.1
miR164-y	CSA032616.1
miR164-y	CSA032690.1
miR164-y	CSA033157.1
miR164-y	CSA033243.1
miR164-y	CSA033821.1
miR164-y	CSA034039.1
miR164-y	CSA034747.1
miR164-y	CSA034945.1
miR164-y	CSA035035.1
miR164-y	CSA035162.1
miR164-y	CSA035301.1
miR164-y	CSA035667.1
miR164-y	CSA035836.1
miR164-y	CSA036107.1
miR164-y	CSA036440.1
miR165-y	CSA001585.1
miR165-y	CSA002151.1
miR165-y	CSA008121.1
miR165-y	CSA013022.1
miR165-y	CSA015090.1
miR165-y	CSA023057.1
miR165-y	CSA030874.1
miR166-x	CSA001544.1
miR166-x	CSA017082.1
miR166-x	CSA017802.1
miR166-x	CSA023955.1
miR166-x	CSA028252.1
miR166-x	CSA028940.1
miR166-x	CSA031362.1
miR166-x	CSA031363.1
miR166-y	CSA001585.1
miR166-y	CSA002151.1
miR166-y	CSA013022.1
miR166-y	CSA015090.1
miR166-y	CSA023057.1
miR166-y	CSA030874.1
miR166-y	CSA035585.1
miR166-z	CSA001585.1
miR166-z	CSA002151.1
miR166-z	CSA007484.1
miR166-z	CSA008121.1
miR166-z	CSA013022.1
miR166-z	CSA015090.1
miR166-z	CSA019909.1
miR166-z	CSA023057.1
miR166-z	CSA030874.1
miR167-x	CSA006586.1
miR167-x	CSA008355.1
miR168-x	CSA007170.1
miR168-x	CSA010947.1
miR168-x	CSA023226.1
miR168-y	CSA000846.1
miR168-y	CSA012640.1
miR168-y	CSA019218.1
miR170-x	CSA011282.1
miR171-x	CSA011282.1
miR171-y	CSA030454.1
miR171-y	CSA031067.1
miR171-y	CSA034367.1
miR171-y	CSA036596.1
miR171-z	CSA020117.1
miR171-z	CSA020620.1
miR171-z	CSA034367.1
miR171-z	CSA036596.1
miR172-x	CSA035552.1
miR172-x	CSA035669.1
miR172-y	CSA008093.1
miR172-y	CSA008508.1
miR172-y	CSA010678.1
miR172-y	CSA010727.1
miR172-y	CSA012157.1
miR172-y	CSA015306.1
miR172-y	CSA020722.1
miR172-y	CSA024034.1
miR172-y	CSA024084.1
miR172-y	CSA024333.1
miR172-y	CSA025379.1
miR172-y	CSA026030.1
miR1863-y	CSA000560.1
miR1863-y	CSA000885.1
miR1863-y	CSA011440.1
miR1863-y	CSA019279.1
miR1863-y	CSA019399.1
miR1863-y	CSA021423.1
miR1863-y	CSA027335.1
miR1863-y	CSA030863.1
miR1863-y	CSA034455.1
miR1865-x	CSA000308.1
miR1865-x	CSA000326.1
miR1865-x	CSA000702.1
miR1865-x	CSA001507.1
miR1865-x	CSA002183.1
miR1865-x	CSA002419.1
miR1865-x	CSA002841.1
miR1865-x	CSA003859.1
miR1865-x	CSA004071.1
miR1865-x	CSA006125.1
miR1865-x	CSA006528.1
miR1865-x	CSA006732.1
miR1865-x	CSA007288.1
miR1865-x	CSA007538.1
miR1865-x	CSA007710.1
miR1865-x	CSA007850.1
miR1865-x	CSA007873.1
miR1865-x	CSA007986.1
miR1865-x	CSA008279.1
miR1865-x	CSA008397.1
miR1865-x	CSA008776.1
miR1865-x	CSA008950.1
miR1865-x	CSA008967.1
miR1865-x	CSA009090.1
miR1865-x	CSA009793.1
miR1865-x	CSA010690.1
miR1865-x	CSA010801.1
miR1865-x	CSA011159.1
miR1865-x	CSA011194.1
miR1865-x	CSA011410.1
miR1865-x	CSA012156.1
miR1865-x	CSA014605.1
miR1865-x	CSA015080.1
miR1865-x	CSA015221.1
miR1865-x	CSA015645.1
miR1865-x	CSA015735.1
miR1865-x	CSA015754.1
miR1865-x	CSA015999.1
miR1865-x	CSA016132.1
miR1865-x	CSA016386.1
miR1865-x	CSA016518.1
miR1865-x	CSA016865.1
miR1865-x	CSA017750.1
miR1865-x	CSA017762.1
miR1865-x	CSA018418.1
miR1865-x	CSA019000.1
miR1865-x	CSA019053.1
miR1865-x	CSA019354.1
miR1865-x	CSA019801.1
miR1865-x	CSA019830.1
miR1865-x	CSA020210.1
miR1865-x	CSA020631.1
miR1865-x	CSA020672.1
miR1865-x	CSA020822.1
miR1865-x	CSA021190.1
miR1865-x	CSA021192.1
miR1865-x	CSA021596.1
miR1865-x	CSA021786.1
miR1865-x	CSA022263.1
miR1865-x	CSA022488.1
miR1865-x	CSA022935.1
miR1865-x	CSA024054.1
miR1865-x	CSA024583.1
miR1865-x	CSA024647.1
miR1865-x	CSA025093.1
miR1865-x	CSA025322.1
miR1865-x	CSA028143.1
miR1865-x	CSA028250.1
miR1865-x	CSA028317.1
miR1865-x	CSA028551.1
miR1865-x	CSA029183.1
miR1865-x	CSA029253.1
miR1865-x	CSA029332.1
miR1865-x	CSA029511.1
miR1865-x	CSA030338.1
miR1865-x	CSA031122.1
miR1865-x	CSA031716.1
miR1865-x	CSA031734.1
miR1865-x	CSA031879.1
miR1865-x	CSA031988.1
miR1865-x	CSA031999.1
miR1865-x	CSA032201.1
miR1865-x	CSA032441.1
miR1865-x	CSA032605.1
miR1865-x	CSA032707.1
miR1865-x	CSA033515.1
miR1865-x	CSA033635.1
miR1865-x	CSA034233.1
miR1865-x	CSA034298.1
miR1865-x	CSA034300.1
miR1865-x	CSA034490.1
miR1865-x	CSA034723.1
miR1865-x	CSA036500.1
miR1865-x	CSA036671.1
miR1866-y	CSA000548.1
miR1866-y	CSA002680.1
miR1866-y	CSA005953.1
miR1866-y	CSA006434.1
miR1866-y	CSA006552.1
miR1866-y	CSA007698.1
miR1866-y	CSA007896.1
miR1866-y	CSA009080.1
miR1866-y	CSA009962.1
miR1866-y	CSA010510.1
miR1866-y	CSA012879.1
miR1866-y	CSA014979.1
miR1866-y	CSA015642.1
miR1866-y	CSA016185.1
miR1866-y	CSA020435.1
miR1866-y	CSA020436.1
miR1866-y	CSA023067.1
miR1866-y	CSA024151.1
miR1866-y	CSA025889.1
miR1866-y	CSA028711.1
miR1866-y	CSA028949.1
miR1866-y	CSA032341.1
miR1866-y	CSA032587.1
miR1871-y	CSA000263.1
miR1871-y	CSA000560.1
miR1871-y	CSA005600.1
miR1871-y	CSA007125.1
miR1871-y	CSA010466.1
miR1871-y	CSA010632.1
miR1871-y	CSA011649.1
miR1871-y	CSA011650.1
miR1871-y	CSA017443.1
miR1871-y	CSA019252.1
miR1871-y	CSA019405.1
miR1871-y	CSA020238.1
miR1871-y	CSA024501.1
miR1871-y	CSA024702.1
miR1871-y	CSA026883.1
miR1871-y	CSA026899.1
miR1871-y	CSA027002.1
miR1871-y	CSA027572.1
miR1871-y	CSA028981.1
miR1871-y	CSA030863.1
miR1871-y	CSA032267.1
miR1871-y	CSA033633.1
miR1871-y	CSA034421.1
miR1919-x	CSA001789.1
miR1919-x	CSA002966.1
miR1919-x	CSA003581.1
miR1919-x	CSA004600.1
miR1919-x	CSA006405.1
miR1919-x	CSA006564.1
miR1919-x	CSA007766.1
miR1919-x	CSA011030.1
miR1919-x	CSA011800.1
miR1919-x	CSA017538.1
miR1919-x	CSA018094.1
miR1919-x	CSA018682.1
miR1919-x	CSA019235.1
miR1919-x	CSA019551.1
miR1919-x	CSA022258.1
miR1919-x	CSA022266.1
miR1919-x	CSA023419.1
miR1919-x	CSA023495.1
miR1919-x	CSA023910.1
miR1919-x	CSA030562.1
miR1919-x	CSA033672.1
miR1919-x	CSA035292.1
miR2083-y	CSA000382.1
miR2083-y	CSA002051.1
miR2083-y	CSA002640.1
miR2083-y	CSA003197.1
miR2083-y	CSA003318.1
miR2083-y	CSA003367.1
miR2083-y	CSA003699.1
miR2083-y	CSA004200.1
miR2083-y	CSA004612.1
miR2083-y	CSA005379.1
miR2083-y	CSA006005.1
miR2083-y	CSA006867.1
miR2083-y	CSA007367.1
miR2083-y	CSA009026.1
miR2083-y	CSA009145.1
miR2083-y	CSA009289.1
miR2083-y	CSA009935.1
miR2083-y	CSA010793.1
miR2083-y	CSA010946.1
miR2083-y	CSA011573.1
miR2083-y	CSA012092.1
miR2083-y	CSA012457.1
miR2083-y	CSA013727.1
miR2083-y	CSA013892.1
miR2083-y	CSA014989.1
miR2083-y	CSA015827.1
miR2083-y	CSA015913.1
miR2083-y	CSA015932.1
miR2083-y	CSA016358.1
miR2083-y	CSA017232.1
miR2083-y	CSA017386.1
miR2083-y	CSA018139.1
miR2083-y	CSA019268.1
miR2083-y	CSA019571.1
miR2083-y	CSA019798.1
miR2083-y	CSA020665.1
miR2083-y	CSA020819.1
miR2083-y	CSA022088.1
miR2083-y	CSA022217.1
miR2083-y	CSA022363.1
miR2083-y	CSA022369.1
miR2083-y	CSA022904.1
miR2083-y	CSA022905.1
miR2083-y	CSA023600.1
miR2083-y	CSA024787.1
miR2083-y	CSA025259.1
miR2083-y	CSA025429.1
miR2083-y	CSA025977.1
miR2083-y	CSA026561.1
miR2083-y	CSA026704.1
miR2083-y	CSA026732.1
miR2083-y	CSA026971.1
miR2083-y	CSA026998.1
miR2083-y	CSA027517.1
miR2083-y	CSA027976.1
miR2083-y	CSA029201.1
miR2083-y	CSA030224.1
miR2083-y	CSA031451.1
miR2083-y	CSA032898.1
miR2083-y	CSA034196.1
miR2083-y	CSA034543.1
miR2083-y	CSA035363.1
miR2083-y	CSA036291.1
miR2083-y	CSA036358.1
miR2083-y	CSA036452.1
miR2083-y	CSA036509.1
miR2083-y	CSA036577.1
miR2083-y	CSA036785.1
miR2083-y	CSA036911.1
miR2111-x	CSA020388.1
miR2111-x	CSA023688.1
miR2111-x	CSA024053.1
miR2111-y	CSA031557.1
miR2118-x	CSA003932.1
miR2118-x	CSA003933.1
miR2118-x	CSA003934.1
miR2118-x	CSA009482.1
miR2118-x	CSA015509.1
miR2118-x	CSA020070.1
miR2118-x	CSA024376.1
miR2118-x	CSA030856.1
miR2118-y	CSA020070.1
miR2218-y	CSA002183.1
miR2218-y	CSA002667.1
miR2218-y	CSA008985.1
miR2218-y	CSA016579.1
miR2218-y	CSA029648.1
miR2275-x	CSA000948.1
miR2275-x	CSA001281.1
miR2275-x	CSA001335.1
miR2275-x	CSA003337.1
miR2275-x	CSA004976.1
miR2275-x	CSA005702.1
miR2275-x	CSA006250.1
miR2275-x	CSA006630.1
miR2275-x	CSA010649.1
miR2275-x	CSA010681.1
miR2275-x	CSA011605.1
miR2275-x	CSA013760.1
miR2275-x	CSA014663.1
miR2275-x	CSA014740.1
miR2275-x	CSA015157.1
miR2275-x	CSA015603.1
miR2275-x	CSA016120.1
miR2275-x	CSA017143.1
miR2275-x	CSA018015.1
miR2275-x	CSA018119.1
miR2275-x	CSA018224.1
miR2275-x	CSA018394.1
miR2275-x	CSA018421.1
miR2275-x	CSA018982.1
miR2275-x	CSA019401.1
miR2275-x	CSA020773.1
miR2275-x	CSA023152.1
miR2275-x	CSA024545.1
miR2275-x	CSA024588.1
miR2275-x	CSA026054.1
miR2275-x	CSA026065.1
miR2275-x	CSA026180.1
miR2275-x	CSA026474.1
miR2275-x	CSA029300.1
miR2275-x	CSA031025.1
miR2275-x	CSA031485.1
miR2275-x	CSA031507.1
miR2275-x	CSA035538.1
miR2275-y	CSA002407.1
miR2275-y	CSA003663.1
miR2275-y	CSA009250.1
miR2275-y	CSA011866.1
miR2275-y	CSA011946.1
miR2275-y	CSA012470.1
miR2275-y	CSA017616.1
miR2275-y	CSA019248.1
miR2275-y	CSA020262.1
miR2275-y	CSA021375.1
miR2275-y	CSA021386.1
miR2275-y	CSA023215.1
miR2275-y	CSA025504.1
miR2275-y	CSA026475.1
miR2275-y	CSA028965.1
miR2275-y	CSA029286.1
miR2275-y	CSA030473.1
miR2275-y	CSA035214.1
miR2275-y	CSA035665.1
miR2275-y	CSA036216.1
miR2916-x	CSA000554.1
miR2916-x	CSA000835.1
miR2916-x	CSA000930.1
miR2916-x	CSA001584.1
miR2916-x	CSA004307.1
miR2916-x	CSA008109.1
miR2916-x	CSA008595.1
miR2916-x	CSA011190.1
miR2916-x	CSA018909.1
miR2916-x	CSA020396.1
miR2916-x	CSA020594.1
miR2916-x	CSA022176.1
miR2916-x	CSA022302.1
miR2916-x	CSA022664.1
miR2916-x	CSA027634.1
miR2916-x	CSA028430.1
miR2916-x	CSA030263.1
miR2916-x	CSA033953.1
miR2916-x	CSA033954.1
miR2916-x	CSA034408.1
miR2916-x	CSA035835.1
miR2916-x	CSA036369.1
miR2916-x	CSA036487.1
miR2938-y	CSA000176.1
miR2938-y	CSA002083.1
miR2938-y	CSA002949.1
miR2938-y	CSA002983.1
miR2938-y	CSA003661.1
miR2938-y	CSA004463.1
miR2938-y	CSA004777.1
miR2938-y	CSA005134.1
miR2938-y	CSA005434.1
miR2938-y	CSA006179.1
miR2938-y	CSA006809.1
miR2938-y	CSA006830.1
miR2938-y	CSA006851.1
miR2938-y	CSA006885.1
miR2938-y	CSA007165.1
miR2938-y	CSA007924.1
miR2938-y	CSA008362.1
miR2938-y	CSA008978.1
miR2938-y	CSA009316.1
miR2938-y	CSA009640.1
miR2938-y	CSA009717.1
miR2938-y	CSA010228.1
miR2938-y	CSA010271.1
miR2938-y	CSA011017.1
miR2938-y	CSA011586.1
miR2938-y	CSA011756.1
miR2938-y	CSA011815.1
miR2938-y	CSA013298.1
miR2938-y	CSA013299.1
miR2938-y	CSA013424.1
miR2938-y	CSA015039.1
miR2938-y	CSA015515.1
miR2938-y	CSA015535.1
miR2938-y	CSA016626.1
miR2938-y	CSA018544.1
miR2938-y	CSA019371.1
miR2938-y	CSA019594.1
miR2938-y	CSA019722.1
miR2938-y	CSA019947.1
miR2938-y	CSA020003.1
miR2938-y	CSA020379.1
miR2938-y	CSA020552.1
miR2938-y	CSA021751.1
miR2938-y	CSA021923.1
miR2938-y	CSA022022.1
miR2938-y	CSA022033.1
miR2938-y	CSA022402.1
miR2938-y	CSA022872.1
miR2938-y	CSA023139.1
miR2938-y	CSA023476.1
miR2938-y	CSA023622.1
miR2938-y	CSA023980.1
miR2938-y	CSA024742.1
miR2938-y	CSA025563.1
miR2938-y	CSA026085.1
miR2938-y	CSA027261.1
miR2938-y	CSA027297.1
miR2938-y	CSA027428.1
miR2938-y	CSA027729.1
miR2938-y	CSA027920.1
miR2938-y	CSA029137.1
miR2938-y	CSA029979.1
miR2938-y	CSA031856.1
miR2938-y	CSA031875.1
miR2938-y	CSA032196.1
miR2938-y	CSA032271.1
miR2938-y	CSA032579.1
miR2938-y	CSA033544.1
miR2938-y	CSA033732.1
miR2938-y	CSA034140.1
miR2938-y	CSA034619.1
miR2938-y	CSA034789.1
miR2938-y	CSA035311.1
miR2938-y	CSA035682.1
miR2938-y	CSA036144.1
miR2938-y	CSA036356.1
miR2938-y	CSA036817.1
miR2938-y	CSA036860.1
miR319-x	CSA003974.1
miR319-x	CSA005021.1
miR319-x	CSA007451.1
miR319-x	CSA014848.1
miR319-x	CSA017867.1
miR319-x	CSA018024.1
miR319-x	CSA018464.1
miR319-x	CSA021711.1
miR319-x	CSA036427.1
miR319-y	CSA002826.1
miR319-y	CSA013833.1
miR319-y	CSA031080.1
miR319-y	CSA036087.1
miR3438-x	CSA001358.1
miR3438-x	CSA003437.1
miR3438-x	CSA004753.1
miR3438-x	CSA005983.1
miR3438-x	CSA007689.1
miR3438-x	CSA008597.1
miR3438-x	CSA008623.1
miR3438-x	CSA010118.1
miR3438-x	CSA011270.1
miR3438-x	CSA011739.1
miR3438-x	CSA013228.1
miR3438-x	CSA013663.1
miR3438-x	CSA015980.1
miR3438-x	CSA016314.1
miR3438-x	CSA016462.1
miR3438-x	CSA016661.1
miR3438-x	CSA016744.1
miR3438-x	CSA017326.1
miR3438-x	CSA018866.1
miR3438-x	CSA019786.1
miR3438-x	CSA021719.1
miR3438-x	CSA022322.1
miR3438-x	CSA024716.1
miR3438-x	CSA027111.1
miR3438-x	CSA027596.1
miR3438-x	CSA028766.1
miR3438-x	CSA030293.1
miR3438-x	CSA035801.1
miR3512-y	CSA000241.1
miR3512-y	CSA000782.1
miR3512-y	CSA001434.1
miR3512-y	CSA001940.1
miR3512-y	CSA002163.1
miR3512-y	CSA003493.1
miR3512-y	CSA004316.1
miR3512-y	CSA004605.1
miR3512-y	CSA004899.1
miR3512-y	CSA005899.1
miR3512-y	CSA006021.1
miR3512-y	CSA007997.1
miR3512-y	CSA008228.1
miR3512-y	CSA008476.1
miR3512-y	CSA009307.1
miR3512-y	CSA009308.1
miR3512-y	CSA010190.1
miR3512-y	CSA010622.1
miR3512-y	CSA013090.1
miR3512-y	CSA013460.1
miR3512-y	CSA013642.1
miR3512-y	CSA014014.1
miR3512-y	CSA014808.1
miR3512-y	CSA014839.1
miR3512-y	CSA017041.1
miR3512-y	CSA017284.1
miR3512-y	CSA017420.1
miR3512-y	CSA017668.1
miR3512-y	CSA017889.1
miR3512-y	CSA018019.1
miR3512-y	CSA018222.1
miR3512-y	CSA019064.1
miR3512-y	CSA019180.1
miR3512-y	CSA019534.1
miR3512-y	CSA020217.1
miR3512-y	CSA020593.1
miR3512-y	CSA020694.1
miR3512-y	CSA021344.1
miR3512-y	CSA022951.1
miR3512-y	CSA023729.1
miR3512-y	CSA023749.1
miR3512-y	CSA026065.1
miR3512-y	CSA026156.1
miR3512-y	CSA026423.1
miR3512-y	CSA026828.1
miR3512-y	CSA026983.1
miR3512-y	CSA027346.1
miR3512-y	CSA027524.1
miR3512-y	CSA028003.1
miR3512-y	CSA030384.1
miR3512-y	CSA030634.1
miR3512-y	CSA030955.1
miR3512-y	CSA031228.1
miR3512-y	CSA032531.1
miR3512-y	CSA033663.1
miR3512-y	CSA033696.1
miR3512-y	CSA033698.1
miR3512-y	CSA035964.1
miR3512-y	CSA036849.1
miR3630-x	CSA001187.1
miR3630-x	CSA002098.1
miR3630-x	CSA008150.1
miR3630-x	CSA009477.1
miR3630-x	CSA016384.1
miR3630-x	CSA017533.1
miR3630-x	CSA017672.1
miR3630-x	CSA017673.1
miR3630-x	CSA020759.1
miR3630-x	CSA020762.1
miR3630-x	CSA025346.1
miR3630-x	CSA032193.1
miR3630-x	CSA032585.1
miR3630-x	CSA032725.1
miR3630-x	CSA034240.1
miR3630-x	CSA036588.1
miR3630-y	CSA035549.1
miR3633-y	CSA000159.1
miR3633-y	CSA002141.1
miR3633-y	CSA002142.1
miR3633-y	CSA002438.1
miR3633-y	CSA008281.1
miR3633-y	CSA008282.1
miR3633-y	CSA009658.1
miR3633-y	CSA009688.1
miR3633-y	CSA009805.1
miR3633-y	CSA013682.1
miR3633-y	CSA018267.1
miR3633-y	CSA021922.1
miR3633-y	CSA023548.1
miR3633-y	CSA024508.1
miR3633-y	CSA025375.1
miR3633-y	CSA025737.1
miR3633-y	CSA027460.1
miR3633-y	CSA028220.1
miR3633-y	CSA028237.1
miR3633-y	CSA029648.1
miR3633-y	CSA030993.1
miR3633-y	CSA035310.1
miR384-x	CSA002792.1
miR384-x	CSA007434.1
miR384-x	CSA013753.1
miR384-x	CSA020325.1
miR384-x	CSA028230.1
miR384-x	CSA029836.1
miR384-x	CSA034219.1
miR390-x	CSA001776.1
miR390-x	CSA001956.1
miR390-x	CSA006028.1
miR390-x	CSA007412.1
miR390-x	CSA011969.1
miR390-x	CSA016385.1
miR390-x	CSA022179.1
miR390-x	CSA026282.1
miR390-x	CSA030630.1
miR390-x	CSA036196.1
miR390-y	CSA024747.1
miR390-y	CSA030021.1
miR393-x	CSA000174.1
miR393-x	CSA002212.1
miR393-x	CSA013063.1
miR393-x	CSA014021.1
miR393-x	CSA014800.1
miR393-x	CSA020105.1
miR393-x	CSA023022.1
miR393-x	CSA024609.1
miR393-x	CSA025438.1
miR393-x	CSA029696.1
miR393-x	CSA035396.1
miR393-x	CSA036164.1
miR393-y	CSA005756.1
miR393-y	CSA006287.1
miR393-y	CSA014282.1
miR393-y	CSA019513.1
miR393-y	CSA020263.1
miR393-y	CSA031938.1
miR394-x	CSA002792.1
miR394-x	CSA007434.1
miR394-x	CSA013753.1
miR394-x	CSA020325.1
miR394-x	CSA028230.1
miR394-x	CSA029836.1
miR394-x	CSA034219.1
miR395-y	CSA000327.1
miR395-y	CSA004600.1
miR395-y	CSA006580.1
miR395-y	CSA028822.1
miR396-x	CSA003330.1
miR396-x	CSA008316.1
miR396-x	CSA012324.1
miR396-x	CSA012327.1
miR396-x	CSA012328.1
miR396-x	CSA012354.1
miR396-x	CSA012956.1
miR396-x	CSA014686.1
miR396-x	CSA018787.1
miR396-x	CSA022206.1
miR396-x	CSA025617.1
miR396-x	CSA030574.1
miR396-x	CSA035992.1
miR396-y	CSA008398.1
miR396-y	CSA024474.1
miR396-y	CSA030469.1
miR398-x	CSA002244.1
miR398-x	CSA004117.1
miR398-x	CSA005189.1
miR398-x	CSA008245.1
miR398-x	CSA009297.1
miR398-x	CSA012093.1
miR398-x	CSA013894.1
miR398-x	CSA016072.1
miR398-x	CSA019537.1
miR398-x	CSA019622.1
miR398-x	CSA020650.1
miR398-x	CSA023546.1
miR398-x	CSA024982.1
miR398-x	CSA025458.1
miR398-x	CSA027287.1
miR398-x	CSA031719.1
miR398-x	CSA031727.1
miR398-x	CSA032438.1
miR398-x	CSA035207.1
miR398-x	CSA035719.1
miR398-y	CSA005929.1
miR398-y	CSA008489.1
miR398-y	CSA009899.1
miR398-y	CSA012148.1
miR398-y	CSA016088.1
miR398-y	CSA017290.1
miR398-y	CSA021125.1
miR398-y	CSA023566.1
miR398-y	CSA026591.1
miR398-y	CSA026698.1
miR398-y	CSA027779.1
miR398-y	CSA029585.1
miR398-y	CSA033141.1
miR398-y	CSA034788.1
miR398-y	CSA035147.1
miR398-y	CSA035932.1
miR399-y	CSA002187.1
miR399-y	CSA005615.1
miR399-y	CSA006132.1
miR399-y	CSA008350.1
miR399-y	CSA019168.1
miR399-y	CSA022134.1
miR399-y	CSA022966.1
miR399-y	CSA031153.1
miR403-x	CSA007624.1
miR408-y	CSA001876.1
miR408-y	CSA003702.1
miR408-y	CSA009655.1
miR408-y	CSA011372.1
miR408-y	CSA013191.1
miR408-y	CSA015213.1
miR408-y	CSA023468.1
miR408-y	CSA026906.1
miR408-y	CSA026962.1
miR408-y	CSA032312.1
miR408-y	CSA036195.1
miR408-y	CSA036276.1
miR4388-y	CSA000510.1
miR4388-y	CSA001410.1
miR4388-y	CSA001817.1
miR4388-y	CSA002813.1
miR4388-y	CSA004059.1
miR4388-y	CSA005255.1
miR4388-y	CSA006541.1
miR4388-y	CSA007783.1
miR4388-y	CSA012294.1
miR4388-y	CSA013394.1
miR4388-y	CSA013866.1
miR4388-y	CSA014835.1
miR4388-y	CSA016205.1
miR4388-y	CSA016521.1
miR4388-y	CSA016944.1
miR4388-y	CSA018242.1
miR4388-y	CSA019203.1
miR4388-y	CSA020827.1
miR4388-y	CSA022824.1
miR4388-y	CSA023401.1
miR4388-y	CSA023763.1
miR4388-y	CSA025438.1
miR4388-y	CSA026861.1
miR4388-y	CSA027388.1
miR4388-y	CSA029943.1
miR4388-y	CSA029946.1
miR4388-y	CSA030973.1
miR4388-y	CSA033581.1
miR4388-y	CSA033982.1
miR4403-x	CSA000097.1
miR4403-x	CSA000467.1
miR4403-x	CSA017445.1
miR472-y	CSA004954.1
miR474-x	CSA000855.1
miR474-x	CSA001187.1
miR474-x	CSA001708.1
miR474-x	CSA001837.1
miR474-x	CSA003370.1
miR474-x	CSA004117.1
miR474-x	CSA004861.1
miR474-x	CSA005619.1
miR474-x	CSA006027.1
miR474-x	CSA006551.1
miR474-x	CSA007144.1
miR474-x	CSA007193.1
miR474-x	CSA008188.1
miR474-x	CSA009407.1
miR474-x	CSA009551.1
miR474-x	CSA009986.1
miR474-x	CSA010946.1
miR474-x	CSA011381.1
miR474-x	CSA011595.1
miR474-x	CSA011808.1
miR474-x	CSA012400.1
miR474-x	CSA014199.1
miR474-x	CSA014520.1
miR474-x	CSA015094.1
miR474-x	CSA015212.1
miR474-x	CSA016858.1
miR474-x	CSA017141.1
miR474-x	CSA017362.1
miR474-x	CSA017513.1
miR474-x	CSA018648.1
miR474-x	CSA019580.1
miR474-x	CSA019818.1
miR474-x	CSA019821.1
miR474-x	CSA020425.1
miR474-x	CSA020533.1
miR474-x	CSA020551.1
miR474-x	CSA020754.1
miR474-x	CSA021400.1
miR474-x	CSA021755.1
miR474-x	CSA022008.1
miR474-x	CSA022685.1
miR474-x	CSA023017.1
miR474-x	CSA023417.1
miR474-x	CSA023578.1
miR474-x	CSA024085.1
miR474-x	CSA024124.1
miR474-x	CSA024220.1
miR474-x	CSA024872.1
miR474-x	CSA025843.1
miR474-x	CSA025971.1
miR474-x	CSA027187.1
miR474-x	CSA027654.1
miR474-x	CSA028506.1
miR474-x	CSA028533.1
miR474-x	CSA029817.1
miR474-x	CSA030903.1
miR474-x	CSA031647.1
miR474-x	CSA031857.1
miR474-x	CSA031859.1
miR474-x	CSA032000.1
miR474-x	CSA032016.1
miR474-x	CSA032527.1
miR474-x	CSA032873.1
miR474-x	CSA034421.1
miR474-x	CSA035377.1
miR474-x	CSA035478.1
miR474-x	CSA035480.1
miR474-x	CSA036512.1
miR474-x	CSA036755.1
miR474-y	CSA026134.1
miR474-y	CSA028196.1
miR474-y	CSA029625.1
miR474-y	CSA029846.1
miR474-y	CSA031081.1
miR474-y	CSA033690.1
miR474-y	CSA033855.1
miR474-y	CSA034442.1
miR477-x	CSA002168.1
miR477-x	CSA009422.1
miR477-x	CSA011264.1
miR477-x	CSA014642.1
miR477-x	CSA014923.1
miR477-x	CSA019621.1
miR477-x	CSA024975.1
miR482-x	CSA009073.1
miR482-x	CSA017189.1
miR482-x	CSA025627.1
miR482-x	CSA026346.1
miR482-x	CSA027958.1
miR482-x	CSA029556.1
miR482-x	CSA032689.1
miR482-y	CSA003932.1
miR482-y	CSA003933.1
miR482-y	CSA003934.1
miR482-y	CSA009482.1
miR482-y	CSA015509.1
miR482-y	CSA020070.1
miR482-y	CSA024376.1
miR482-y	CSA030856.1
miR482-z	CSA000828.1
miR482-z	CSA006457.1
miR482-z	CSA007221.1
miR482-z	CSA013303.1
miR482-z	CSA026374.1
miR482-z	CSA029379.1
miR4994-y	CSA000903.1
miR4994-y	CSA002011.1
miR4994-y	CSA003973.1
miR4994-y	CSA005843.1
miR4994-y	CSA009039.1
miR4994-y	CSA010402.1
miR4994-y	CSA012068.1
miR4994-y	CSA012429.1
miR4994-y	CSA017508.1
miR4994-y	CSA019122.1
miR4994-y	CSA019700.1
miR4994-y	CSA020965.1
miR4994-y	CSA021395.1
miR4994-y	CSA022853.1
miR4994-y	CSA025259.1
miR4994-y	CSA028516.1
miR4994-y	CSA028648.1
miR4994-y	CSA032438.1
miR4994-y	CSA033624.1
miR4994-y	CSA035314.1
miR4995-x	CSA000974.1
miR4995-x	CSA002614.1
miR4995-x	CSA004150.1
miR4995-x	CSA004177.1
miR4995-x	CSA004346.1
miR4995-x	CSA006917.1
miR4995-x	CSA008125.1
miR4995-x	CSA008440.1
miR4995-x	CSA008664.1
miR4995-x	CSA008678.1
miR4995-x	CSA009277.1
miR4995-x	CSA009517.1
miR4995-x	CSA010673.1
miR4995-x	CSA012248.1
miR4995-x	CSA013027.1
miR4995-x	CSA013643.1
miR4995-x	CSA013729.1
miR4995-x	CSA016244.1
miR4995-x	CSA016646.1
miR4995-x	CSA017202.1
miR4995-x	CSA017843.1
miR4995-x	CSA017892.1
miR4995-x	CSA018268.1
miR4995-x	CSA018655.1
miR4995-x	CSA020140.1
miR4995-x	CSA021611.1
miR4995-x	CSA022767.1
miR4995-x	CSA022789.1
miR4995-x	CSA022937.1
miR4995-x	CSA023276.1
miR4995-x	CSA025026.1
miR4995-x	CSA025082.1
miR4995-x	CSA025570.1
miR4995-x	CSA025840.1
miR4995-x	CSA026140.1
miR4995-x	CSA027298.1
miR4995-x	CSA027392.1
miR4995-x	CSA030139.1
miR4995-x	CSA030397.1
miR4995-x	CSA030415.1
miR4995-x	CSA032737.1
miR4995-x	CSA033146.1
miR4995-x	CSA033641.1
miR4995-x	CSA035525.1
miR4995-x	CSA035714.1
miR4995-x	CSA036117.1
miR4995-x	CSA036352.1
miR5021-x	CSA000012.1
miR5021-x	CSA000051.1
miR5021-x	CSA000171.1
miR5021-x	CSA000257.1
miR5021-x	CSA000505.1
miR5021-x	CSA000538.1
miR5021-x	CSA000791.1
miR5021-x	CSA001089.1
miR5021-x	CSA001308.1
miR5021-x	CSA001683.1
miR5021-x	CSA001776.1
miR5021-x	CSA001783.1
miR5021-x	CSA001805.1
miR5021-x	CSA002080.1
miR5021-x	CSA002108.1
miR5021-x	CSA002212.1
miR5021-x	CSA002302.1
miR5021-x	CSA002307.1
miR5021-x	CSA002673.1
miR5021-x	CSA003041.1
miR5021-x	CSA003065.1
miR5021-x	CSA003139.1
miR5021-x	CSA003320.1
miR5021-x	CSA003624.1
miR5021-x	CSA003741.1
miR5021-x	CSA003861.1
miR5021-x	CSA004220.1
miR5021-x	CSA004418.1
miR5021-x	CSA004453.1
miR5021-x	CSA004904.1
miR5021-x	CSA005074.1
miR5021-x	CSA005172.1
miR5021-x	CSA005203.1
miR5021-x	CSA005254.1
miR5021-x	CSA005445.1
miR5021-x	CSA005488.1
miR5021-x	CSA005567.1
miR5021-x	CSA005648.1
miR5021-x	CSA005878.1
miR5021-x	CSA006017.1
miR5021-x	CSA006021.1
miR5021-x	CSA006109.1
miR5021-x	CSA006285.1
miR5021-x	CSA006446.1
miR5021-x	CSA006474.1
miR5021-x	CSA006495.1
miR5021-x	CSA006720.1
miR5021-x	CSA006949.1
miR5021-x	CSA007011.1
miR5021-x	CSA007073.1
miR5021-x	CSA007093.1
miR5021-x	CSA007217.1
miR5021-x	CSA007586.1
miR5021-x	CSA007645.1
miR5021-x	CSA007703.1
miR5021-x	CSA008139.1
miR5021-x	CSA008180.1
miR5021-x	CSA008254.1
miR5021-x	CSA008256.1
miR5021-x	CSA008680.1
miR5021-x	CSA008908.1
miR5021-x	CSA008975.1
miR5021-x	CSA009160.1
miR5021-x	CSA009214.1
miR5021-x	CSA009540.1
miR5021-x	CSA009633.1
miR5021-x	CSA009692.1
miR5021-x	CSA009716.1
miR5021-x	CSA009727.1
miR5021-x	CSA009769.1
miR5021-x	CSA009988.1
miR5021-x	CSA009989.1
miR5021-x	CSA009993.1
miR5021-x	CSA010275.1
miR5021-x	CSA010347.1
miR5021-x	CSA010406.1
miR5021-x	CSA010605.1
miR5021-x	CSA010950.1
miR5021-x	CSA010960.1
miR5021-x	CSA011028.1
miR5021-x	CSA011033.1
miR5021-x	CSA011134.1
miR5021-x	CSA011389.1
miR5021-x	CSA011597.1
miR5021-x	CSA011636.1
miR5021-x	CSA011932.1
miR5021-x	CSA012406.1
miR5021-x	CSA012674.1
miR5021-x	CSA012806.1
miR5021-x	CSA013038.1
miR5021-x	CSA013184.1
miR5021-x	CSA013195.1
miR5021-x	CSA013250.1
miR5021-x	CSA013309.1
miR5021-x	CSA013456.1
miR5021-x	CSA013753.1
miR5021-x	CSA013766.1
miR5021-x	CSA013832.1
miR5021-x	CSA013917.1
miR5021-x	CSA014289.1
miR5021-x	CSA014321.1
miR5021-x	CSA014420.1
miR5021-x	CSA014483.1
miR5021-x	CSA014549.1
miR5021-x	CSA014634.1
miR5021-x	CSA014662.1
miR5021-x	CSA014755.1
miR5021-x	CSA014922.1
miR5021-x	CSA015014.1
miR5021-x	CSA015138.1
miR5021-x	CSA015146.1
miR5021-x	CSA015157.1
miR5021-x	CSA015197.1
miR5021-x	CSA015372.1
miR5021-x	CSA015373.1
miR5021-x	CSA015656.1
miR5021-x	CSA015735.1
miR5021-x	CSA015748.1
miR5021-x	CSA016158.1
miR5021-x	CSA016271.1
miR5021-x	CSA016318.1
miR5021-x	CSA016339.1
miR5021-x	CSA016344.1
miR5021-x	CSA017090.1
miR5021-x	CSA017324.1
miR5021-x	CSA017378.1
miR5021-x	CSA017437.1
miR5021-x	CSA017524.1
miR5021-x	CSA017765.1
miR5021-x	CSA018036.1
miR5021-x	CSA018083.1
miR5021-x	CSA018159.1
miR5021-x	CSA018235.1
miR5021-x	CSA018268.1
miR5021-x	CSA018337.1
miR5021-x	CSA018549.1
miR5021-x	CSA018625.1
miR5021-x	CSA018958.1
miR5021-x	CSA018985.1
miR5021-x	CSA019162.1
miR5021-x	CSA019183.1
miR5021-x	CSA019327.1
miR5021-x	CSA019440.1
miR5021-x	CSA019483.1
miR5021-x	CSA019657.1
miR5021-x	CSA019700.1
miR5021-x	CSA019802.1
miR5021-x	CSA019993.1
miR5021-x	CSA020047.1
miR5021-x	CSA020114.1
miR5021-x	CSA020279.1
miR5021-x	CSA020336.1
miR5021-x	CSA020480.1
miR5021-x	CSA020599.1
miR5021-x	CSA020773.1
miR5021-x	CSA021064.1
miR5021-x	CSA021281.1
miR5021-x	CSA021282.1
miR5021-x	CSA021293.1
miR5021-x	CSA021476.1
miR5021-x	CSA021573.1
miR5021-x	CSA021609.1
miR5021-x	CSA021860.1
miR5021-x	CSA021861.1
miR5021-x	CSA021907.1
miR5021-x	CSA022107.1
miR5021-x	CSA022446.1
miR5021-x	CSA022730.1
miR5021-x	CSA022920.1
miR5021-x	CSA023179.1
miR5021-x	CSA023234.1
miR5021-x	CSA023424.1
miR5021-x	CSA023945.1
miR5021-x	CSA024113.1
miR5021-x	CSA024386.1
miR5021-x	CSA024447.1
miR5021-x	CSA024525.1
miR5021-x	CSA024698.1
miR5021-x	CSA024728.1
miR5021-x	CSA024868.1
miR5021-x	CSA024873.1
miR5021-x	CSA025187.1
miR5021-x	CSA025372.1
miR5021-x	CSA025496.1
miR5021-x	CSA026006.1
miR5021-x	CSA026037.1
miR5021-x	CSA026064.1
miR5021-x	CSA026146.1
miR5021-x	CSA026344.1
miR5021-x	CSA026375.1
miR5021-x	CSA026495.1
miR5021-x	CSA026755.1
miR5021-x	CSA026827.1
miR5021-x	CSA026914.1
miR5021-x	CSA026938.1
miR5021-x	CSA026975.1
miR5021-x	CSA026998.1
miR5021-x	CSA027034.1
miR5021-x	CSA027417.1
miR5021-x	CSA027452.1
miR5021-x	CSA027473.1
miR5021-x	CSA027482.1
miR5021-x	CSA027661.1
miR5021-x	CSA027672.1
miR5021-x	CSA027673.1
miR5021-x	CSA027868.1
miR5021-x	CSA027885.1
miR5021-x	CSA027893.1
miR5021-x	CSA027936.1
miR5021-x	CSA028291.1
miR5021-x	CSA028398.1
miR5021-x	CSA028493.1
miR5021-x	CSA028548.1
miR5021-x	CSA028732.1
miR5021-x	CSA028796.1
miR5021-x	CSA028828.1
miR5021-x	CSA028854.1
miR5021-x	CSA028992.1
miR5021-x	CSA029062.1
miR5021-x	CSA029072.1
miR5021-x	CSA029253.1
miR5021-x	CSA029725.1
miR5021-x	CSA030287.1
miR5021-x	CSA030310.1
miR5021-x	CSA030469.1
miR5021-x	CSA030486.1
miR5021-x	CSA030569.1
miR5021-x	CSA030581.1
miR5021-x	CSA030616.1
miR5021-x	CSA031078.1
miR5021-x	CSA031327.1
miR5021-x	CSA031464.1
miR5021-x	CSA031954.1
miR5021-x	CSA031955.1
miR5021-x	CSA032255.1
miR5021-x	CSA032376.1
miR5021-x	CSA032400.1
miR5021-x	CSA032460.1
miR5021-x	CSA033191.1
miR5021-x	CSA033376.1
miR5021-x	CSA033706.1
miR5021-x	CSA033794.1
miR5021-x	CSA034061.1
miR5021-x	CSA034144.1
miR5021-x	CSA034196.1
miR5021-x	CSA034208.1
miR5021-x	CSA034382.1
miR5021-x	CSA034510.1
miR5021-x	CSA034566.1
miR5021-x	CSA034737.1
miR5021-x	CSA034829.1
miR5021-x	CSA034944.1
miR5021-x	CSA035519.1
miR5021-x	CSA035871.1
miR5021-x	CSA036078.1
miR5021-x	CSA036667.1
miR5021-x	CSA036742.1
miR5021-x	CSA036779.1
miR5054-y	CSA000666.1
miR5054-y	CSA003350.1
miR5054-y	CSA005482.1
miR5054-y	CSA005619.1
miR5054-y	CSA006444.1
miR5054-y	CSA006958.1
miR5054-y	CSA009054.1
miR5054-y	CSA009788.1
miR5054-y	CSA012237.1
miR5054-y	CSA018420.1
miR5054-y	CSA019354.1
miR5054-y	CSA020905.1
miR5054-y	CSA022117.1
miR5054-y	CSA022269.1
miR5054-y	CSA022979.1
miR5054-y	CSA024449.1
miR5054-y	CSA024609.1
miR5054-y	CSA026471.1
miR5054-y	CSA028249.1
miR5054-y	CSA029175.1
miR5054-y	CSA031597.1
miR5054-y	CSA035987.1
miR5054-y	CSA036624.1
miR5054-y	CSA036823.1
miR5055-x	CSA018374.1
miR5055-x	CSA035474.1
miR5059-x	CSA000236.1
miR5059-x	CSA000306.1
miR5059-x	CSA000547.1
miR5059-x	CSA000963.1
miR5059-x	CSA001280.1
miR5059-x	CSA001832.1
miR5059-x	CSA002016.1
miR5059-x	CSA002144.1
miR5059-x	CSA002156.1
miR5059-x	CSA002535.1
miR5059-x	CSA002576.1
miR5059-x	CSA002716.1
miR5059-x	CSA003021.1
miR5059-x	CSA003382.1
miR5059-x	CSA003449.1
miR5059-x	CSA003676.1
miR5059-x	CSA003695.1
miR5059-x	CSA003829.1
miR5059-x	CSA004242.1
miR5059-x	CSA004785.1
miR5059-x	CSA005166.1
miR5059-x	CSA005360.1
miR5059-x	CSA005432.1
miR5059-x	CSA005697.1
miR5059-x	CSA005714.1
miR5059-x	CSA006085.1
miR5059-x	CSA006121.1
miR5059-x	CSA006330.1
miR5059-x	CSA006612.1
miR5059-x	CSA006847.1
miR5059-x	CSA008141.1
miR5059-x	CSA008595.1
miR5059-x	CSA008682.1
miR5059-x	CSA009263.1
miR5059-x	CSA009319.1
miR5059-x	CSA009347.1
miR5059-x	CSA009437.1
miR5059-x	CSA009732.1
miR5059-x	CSA009765.1
miR5059-x	CSA009889.1
miR5059-x	CSA009939.1
miR5059-x	CSA010037.1
miR5059-x	CSA010486.1
miR5059-x	CSA010922.1
miR5059-x	CSA011466.1
miR5059-x	CSA011695.1
miR5059-x	CSA011757.1
miR5059-x	CSA012053.1
miR5059-x	CSA012823.1
miR5059-x	CSA013596.1
miR5059-x	CSA013876.1
miR5059-x	CSA014455.1
miR5059-x	CSA014716.1
miR5059-x	CSA014870.1
miR5059-x	CSA015242.1
miR5059-x	CSA015931.1
miR5059-x	CSA016008.1
miR5059-x	CSA017064.1
miR5059-x	CSA017432.1
miR5059-x	CSA017745.1
miR5059-x	CSA018420.1
miR5059-x	CSA018442.1
miR5059-x	CSA018557.1
miR5059-x	CSA018572.1
miR5059-x	CSA020760.1
miR5059-x	CSA021092.1
miR5059-x	CSA021564.1
miR5059-x	CSA021620.1
miR5059-x	CSA021849.1
miR5059-x	CSA022312.1
miR5059-x	CSA022340.1
miR5059-x	CSA022641.1
miR5059-x	CSA022777.1
miR5059-x	CSA023062.1
miR5059-x	CSA023348.1
miR5059-x	CSA023743.1
miR5059-x	CSA023924.1
miR5059-x	CSA023994.1
miR5059-x	CSA024047.1
miR5059-x	CSA024050.1
miR5059-x	CSA024100.1
miR5059-x	CSA024145.1
miR5059-x	CSA024188.1
miR5059-x	CSA024608.1
miR5059-x	CSA024778.1
miR5059-x	CSA024930.1
miR5059-x	CSA025749.1
miR5059-x	CSA025776.1
miR5059-x	CSA025854.1
miR5059-x	CSA025855.1
miR5059-x	CSA025985.1
miR5059-x	CSA026361.1
miR5059-x	CSA026412.1
miR5059-x	CSA027187.1
miR5059-x	CSA027464.1
miR5059-x	CSA027749.1
miR5059-x	CSA028497.1
miR5059-x	CSA028880.1
miR5059-x	CSA029211.1
miR5059-x	CSA029276.1
miR5059-x	CSA029754.1
miR5059-x	CSA031019.1
miR5059-x	CSA031082.1
miR5059-x	CSA031121.1
miR5059-x	CSA031610.1
miR5059-x	CSA031816.1
miR5059-x	CSA032114.1
miR5059-x	CSA032583.1
miR5059-x	CSA032584.1
miR5059-x	CSA032598.1
miR5059-x	CSA032843.1
miR5059-x	CSA033096.1
miR5059-x	CSA033113.1
miR5059-x	CSA033137.1
miR5059-x	CSA033157.1
miR5059-x	CSA033252.1
miR5059-x	CSA033283.1
miR5059-x	CSA033583.1
miR5059-x	CSA033636.1
miR5059-x	CSA033805.1
miR5059-x	CSA033869.1
miR5059-x	CSA033889.1
miR5059-x	CSA033973.1
miR5059-x	CSA034373.1
miR5059-x	CSA035316.1
miR5059-x	CSA035465.1
miR5059-x	CSA036078.1
miR5059-x	CSA036865.1
miR5059-x	CSA036884.1
miR5061-y	CSA028137.1
miR5072-x	CSA000598.1
miR5072-x	CSA000668.1
miR5072-x	CSA002690.1
miR5072-x	CSA004584.1
miR5072-x	CSA006586.1
miR5072-x	CSA007071.1
miR5072-x	CSA007099.1
miR5072-x	CSA007400.1
miR5072-x	CSA008464.1
miR5072-x	CSA010377.1
miR5072-x	CSA011461.1
miR5072-x	CSA012051.1
miR5072-x	CSA013340.1
miR5072-x	CSA016213.1
miR5072-x	CSA017950.1
miR5072-x	CSA018120.1
miR5072-x	CSA018955.1
miR5072-x	CSA019926.1
miR5072-x	CSA021727.1
miR5072-x	CSA021801.1
miR5072-x	CSA022760.1
miR5072-x	CSA023391.1
miR5072-x	CSA023955.1
miR5072-x	CSA024311.1
miR5072-x	CSA024315.1
miR5072-x	CSA025541.1
miR5072-x	CSA026171.1
miR5072-x	CSA026174.1
miR5072-x	CSA026797.1
miR5072-x	CSA027795.1
miR5072-x	CSA028056.1
miR5072-x	CSA029973.1
miR5072-x	CSA030112.1
miR5072-x	CSA030825.1
miR5072-x	CSA031793.1
miR5072-x	CSA032071.1
miR5072-x	CSA032547.1
miR5072-x	CSA033133.1
miR5072-x	CSA034003.1
miR5072-x	CSA034391.1
miR5072-x	CSA034402.1
miR5072-x	CSA034934.1
miR5077-x	CSA007913.1
miR5077-x	CSA016205.1
miR5083-y	CSA002572.1
miR5083-y	CSA002677.1
miR5083-y	CSA004982.1
miR5083-y	CSA007508.1
miR5083-y	CSA008326.1
miR5083-y	CSA010163.1
miR5083-y	CSA011050.1
miR5083-y	CSA011697.1
miR5083-y	CSA012939.1
miR5083-y	CSA013244.1
miR5083-y	CSA016043.1
miR5083-y	CSA016064.1
miR5083-y	CSA018911.1
miR5083-y	CSA019657.1
miR5083-y	CSA023708.1
miR5083-y	CSA024037.1
miR5083-y	CSA024038.1
miR5083-y	CSA024445.1
miR5083-y	CSA026387.1
miR5083-y	CSA032512.1
miR5083-y	CSA035478.1
miR5083-y	CSA036373.1
miR5139-x	CSA000605.1
miR5139-x	CSA000972.1
miR5139-x	CSA001314.1
miR5139-x	CSA001490.1
miR5139-x	CSA002134.1
miR5139-x	CSA002585.1
miR5139-x	CSA005610.1
miR5139-x	CSA006167.1
miR5139-x	CSA006279.1
miR5139-x	CSA006547.1
miR5139-x	CSA006567.1
miR5139-x	CSA006640.1
miR5139-x	CSA007125.1
miR5139-x	CSA007849.1
miR5139-x	CSA009180.1
miR5139-x	CSA010466.1
miR5139-x	CSA010632.1
miR5139-x	CSA011649.1
miR5139-x	CSA011650.1
miR5139-x	CSA012851.1
miR5139-x	CSA013099.1
miR5139-x	CSA013813.1
miR5139-x	CSA013933.1
miR5139-x	CSA014310.1
miR5139-x	CSA014842.1
miR5139-x	CSA015965.1
miR5139-x	CSA016207.1
miR5139-x	CSA017336.1
miR5139-x	CSA017571.1
miR5139-x	CSA019279.1
miR5139-x	CSA024501.1
miR5139-x	CSA026899.1
miR5139-x	CSA027002.1
miR5139-x	CSA028981.1
miR5139-x	CSA030288.1
miR5139-x	CSA030806.1
miR5139-x	CSA032498.1
miR5139-x	CSA033017.1
miR5139-x	CSA033907.1
miR5139-x	CSA035229.1
miR5139-x	CSA035951.1
miR5139-x	CSA036854.1
miR5168-y	CSA007484.1
miR5168-y	CSA013022.1
miR5168-y	CSA015090.1
miR5168-y	CSA016775.1
miR5168-y	CSA017537.1
miR5168-y	CSA022473.1
miR5168-y	CSA026209.1
miR5168-y	CSA035585.1
miR5181-y	CSA001140.1
miR5181-y	CSA001801.1
miR5181-y	CSA006551.1
miR5181-y	CSA007005.1
miR5181-y	CSA007902.1
miR5181-y	CSA009038.1
miR5181-y	CSA013707.1
miR5181-y	CSA017889.1
[truncated: 6,665 more rows]
